# Supplementary material
Source: MDPI journal article supplement (https://www.mdpi.com/2072-4292/14/11/2608)
Supplement: s1 [file s1]

## Supplementary materials of

### *“Quantifying Water Consumption through the Satellite Estimation of Land Use/Land Cover and*

### *Groundwater Storage Changes in a Hyper-Arid Region of Egypt”*

AYIHUMAIER HALIPU<sup>1, \*</sup>, Xuechen Wang<sup>1</sup>, Erina Iwasaki<sup>2</sup>, Wei Yang<sup>1,2</sup> and Akihiko Kondoh<sup>1,3</sup>

<sup>1</sup> Graduate School of Science and Engineering, Chiba University, Chiba 263-8522, Japan; casa6077@chiba-u.jp

<sup>2</sup> Faculty of Foreign Studies, Sophia University, Tokyo 102-8554, Japan; iwasaki@sophia.ac.jp

<sup>3</sup> Center for Environmental Remote Sensing, Chiba University, Chiba 263-8522, Japan;  
yangwei@chiba-u.jp (W.Y.); kondoh@faculty.chiba-u.jp (A.K.)

\* Correspondence: ayxa6085@chiba-u.jp

In the supplementary materials, we revealed all of the LULC maps constructed using OBIA methods in three oases of New Valley, Egypt.

## 2 Kharga Oasis

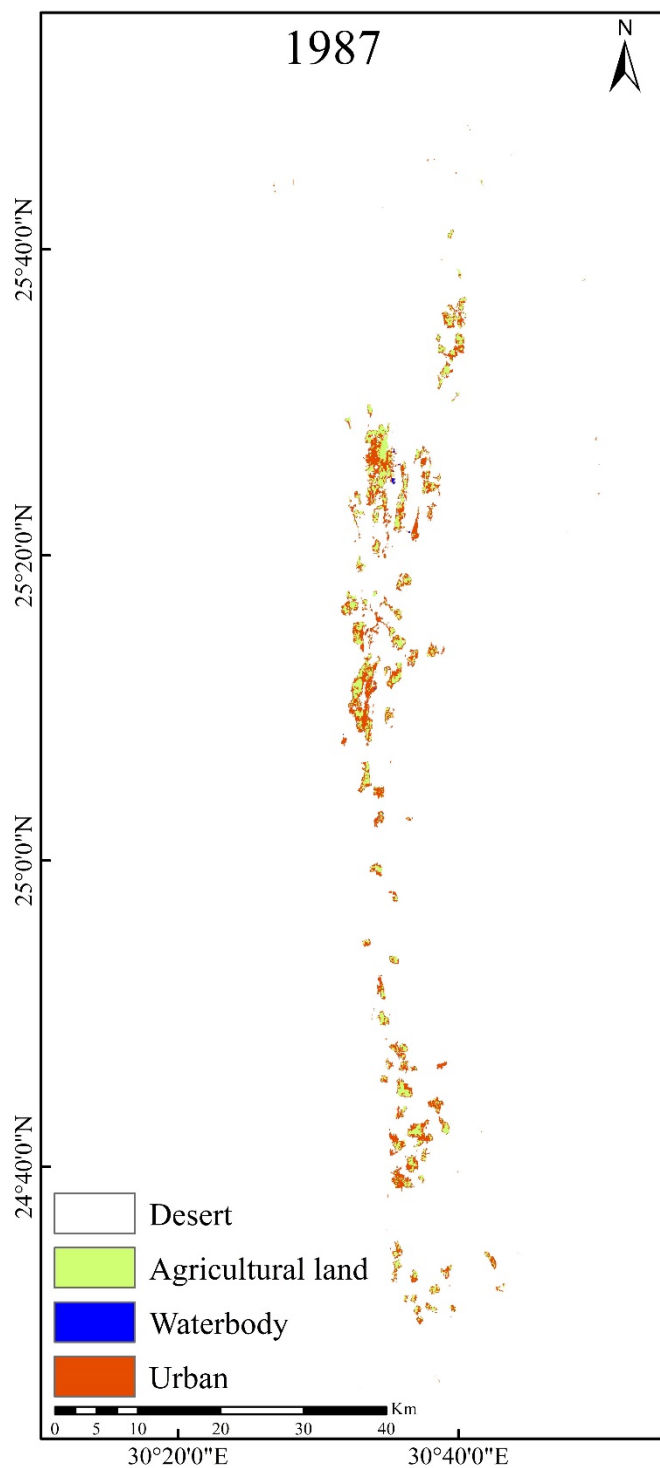

(a)

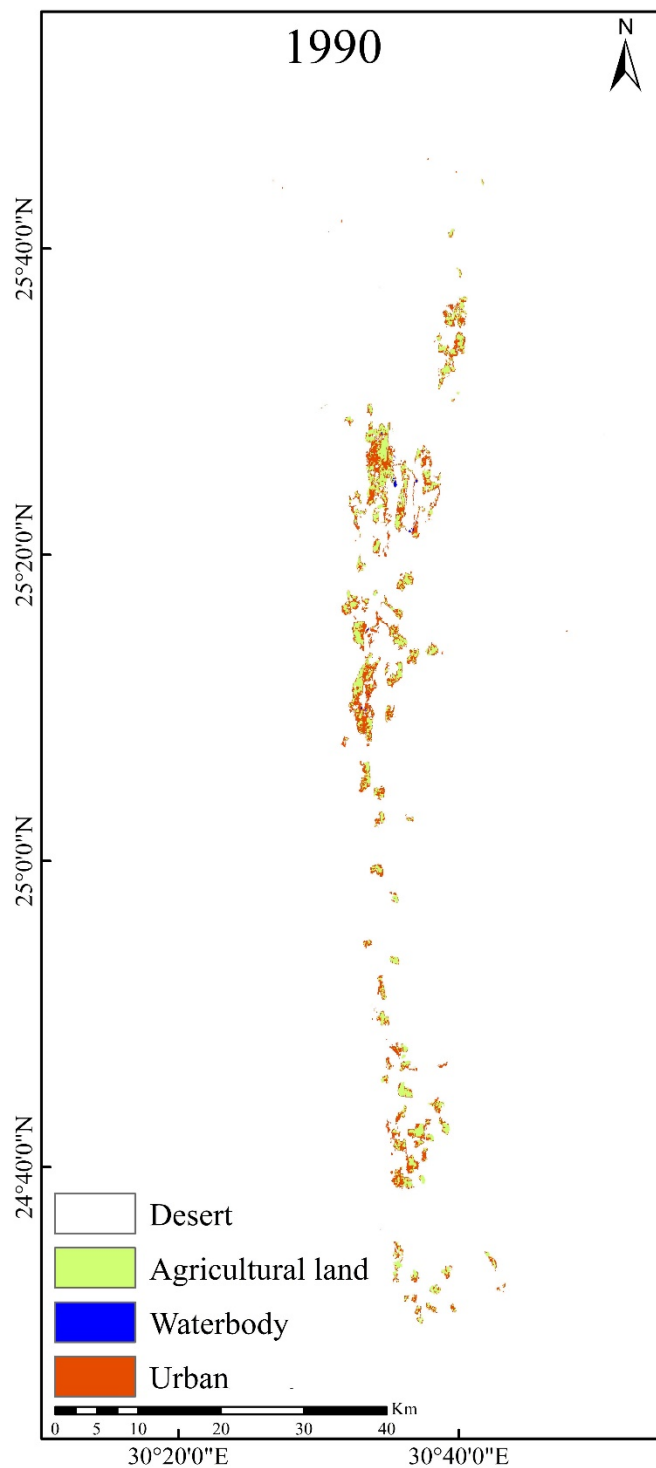

(b)

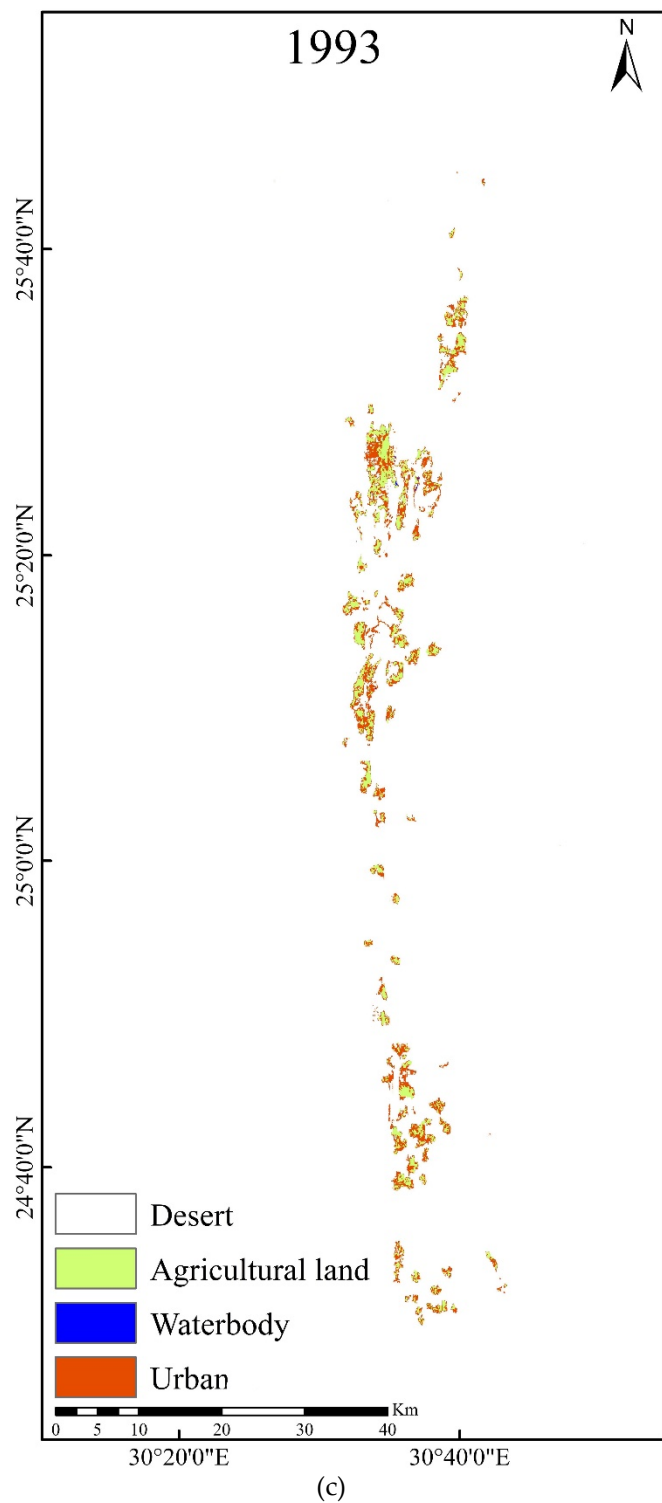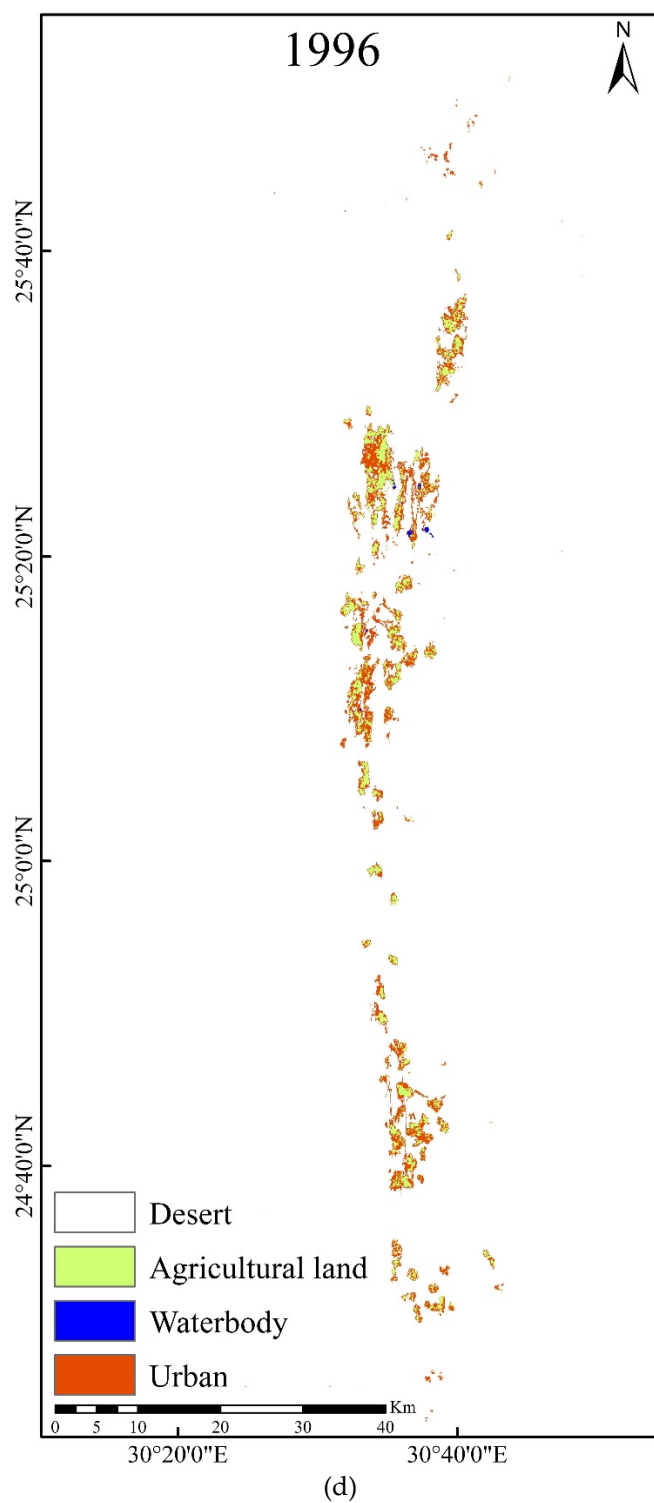

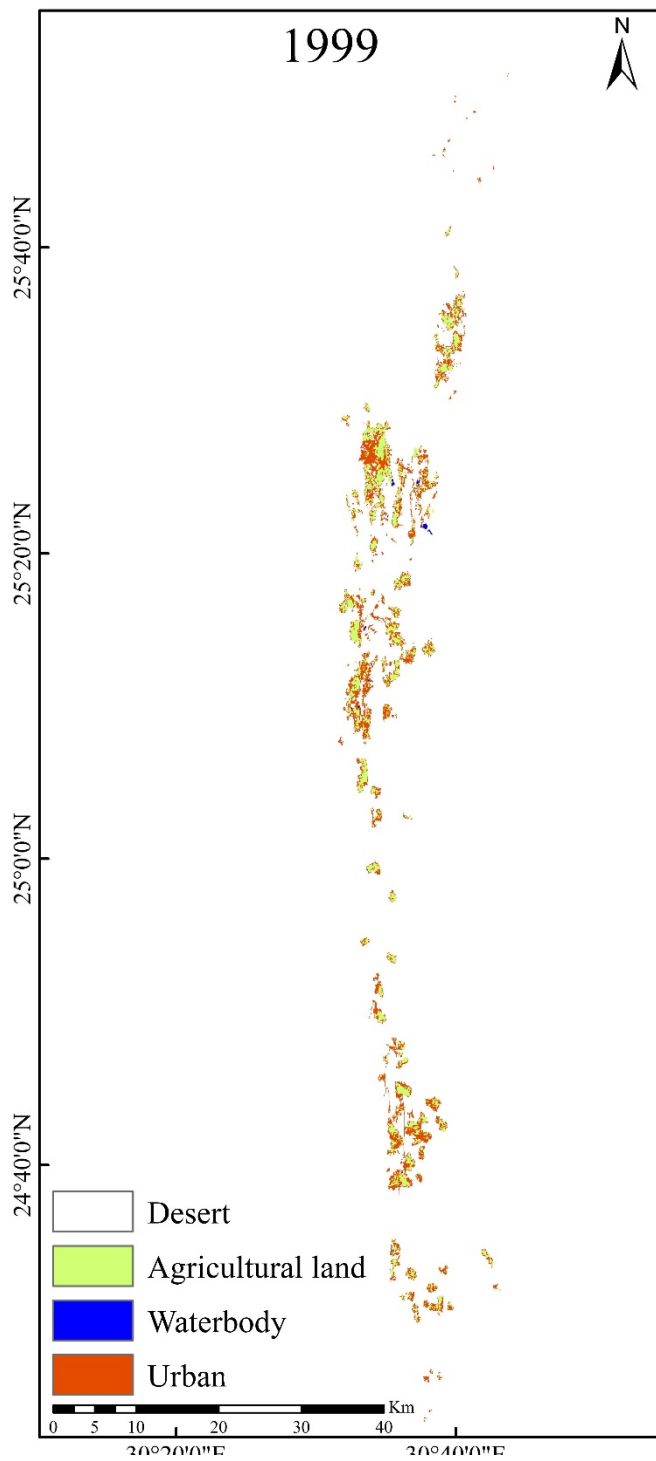

(e)

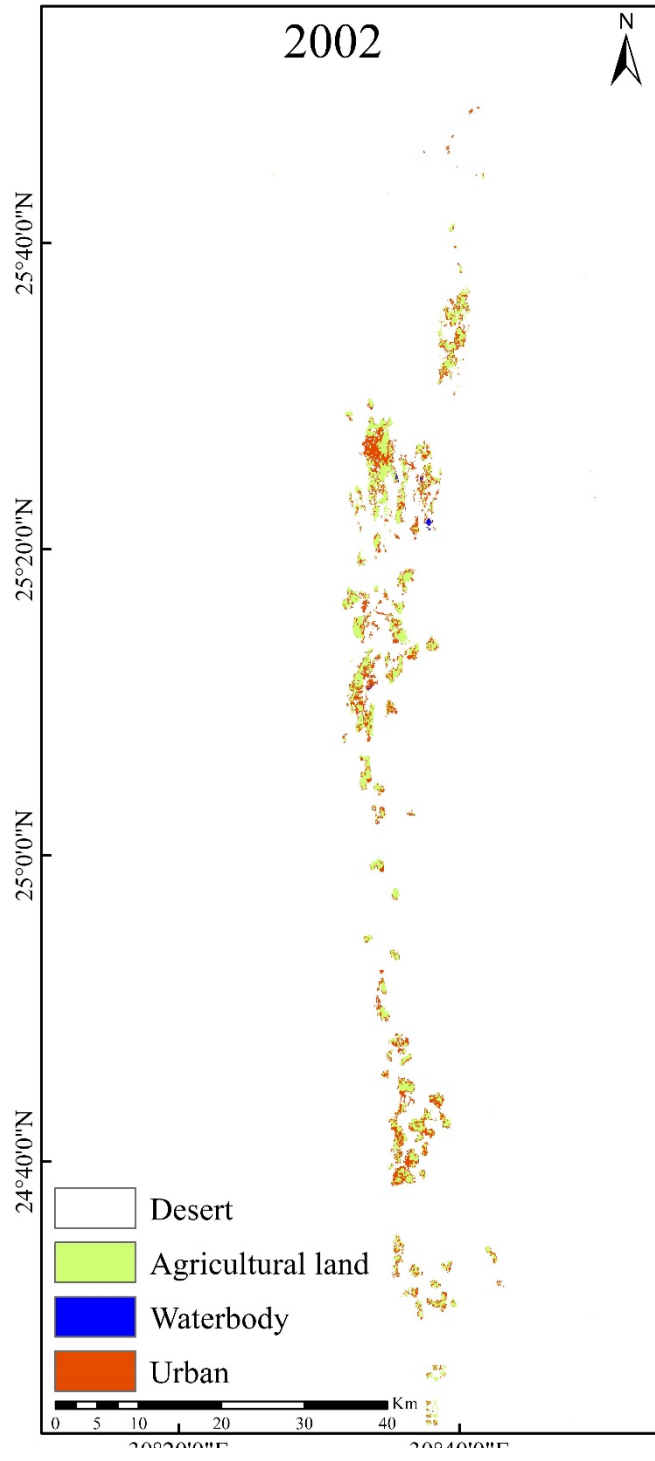

(f)

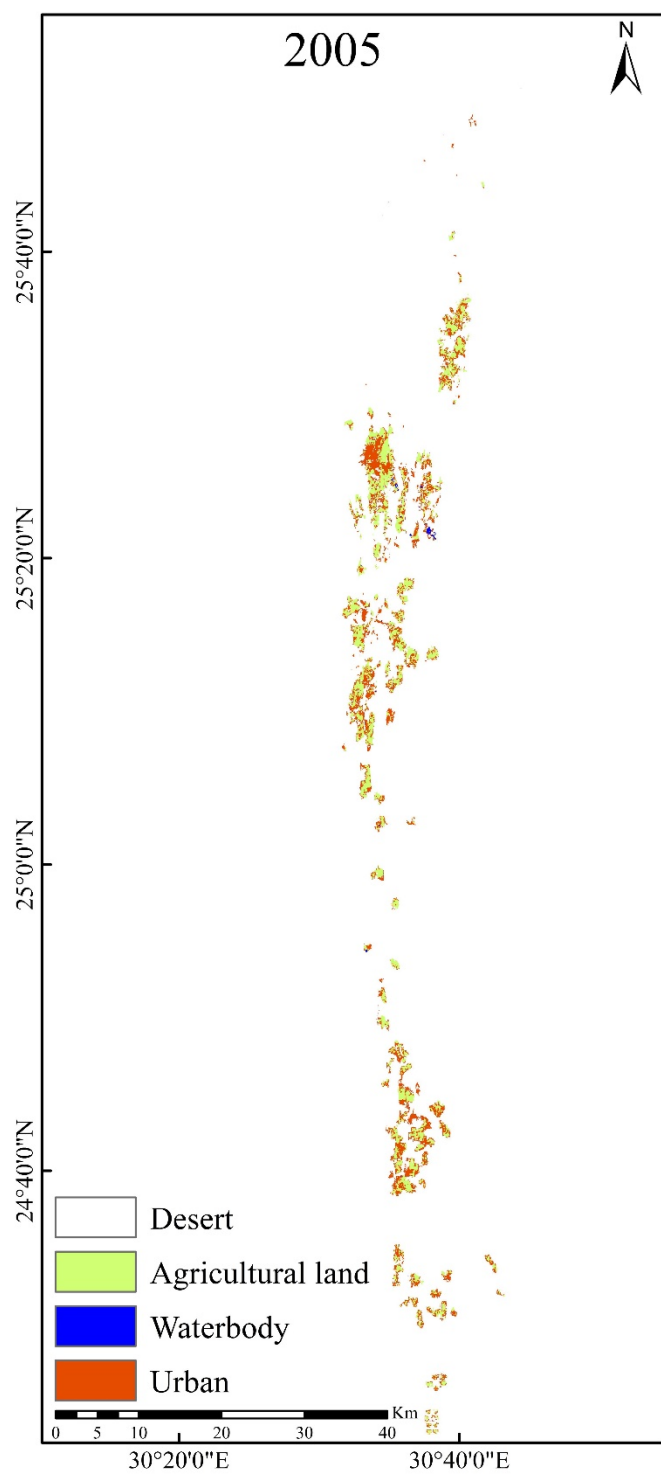

(g)

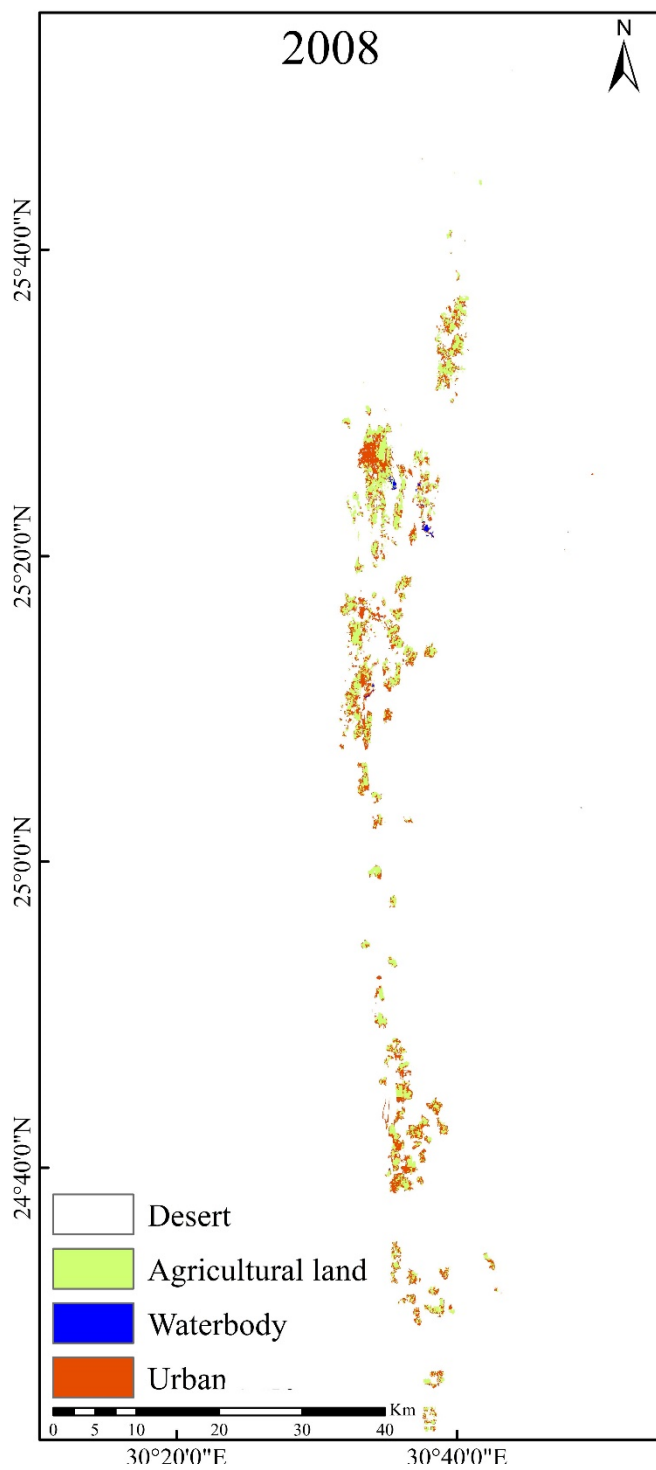

(h)

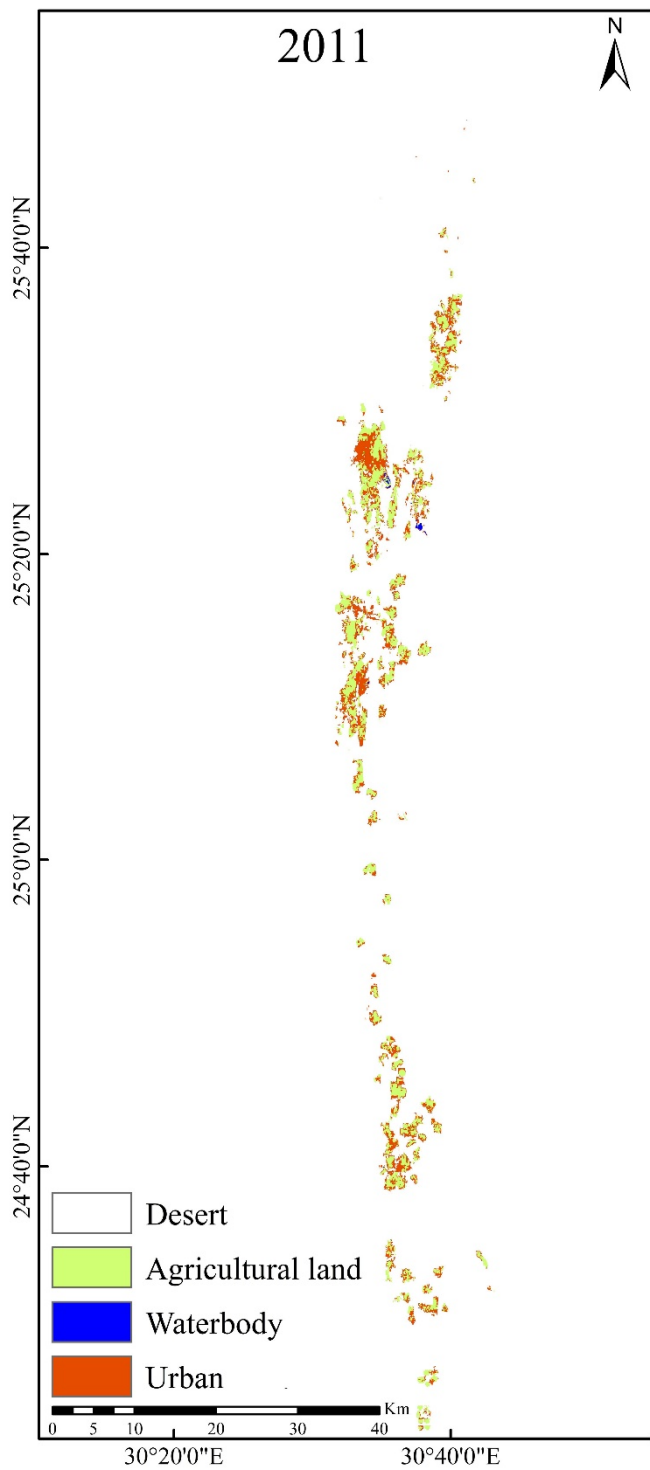

(i)

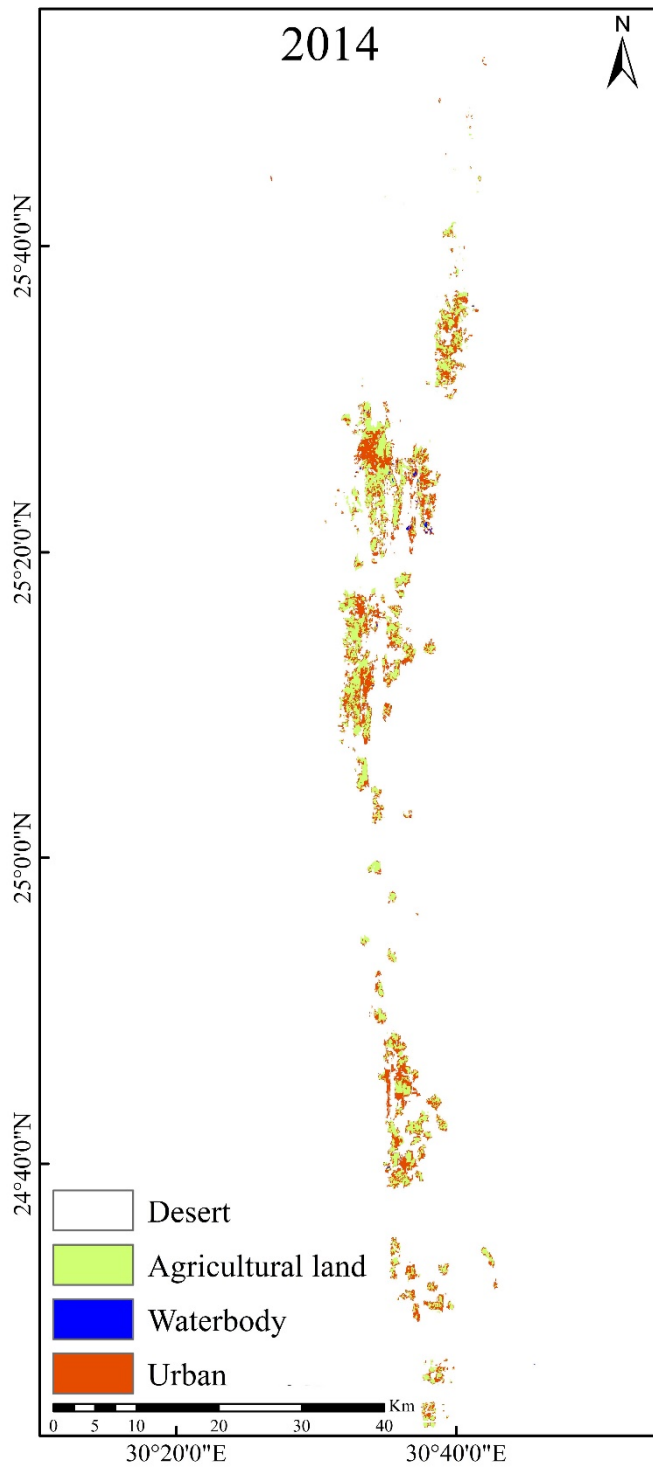

(j)

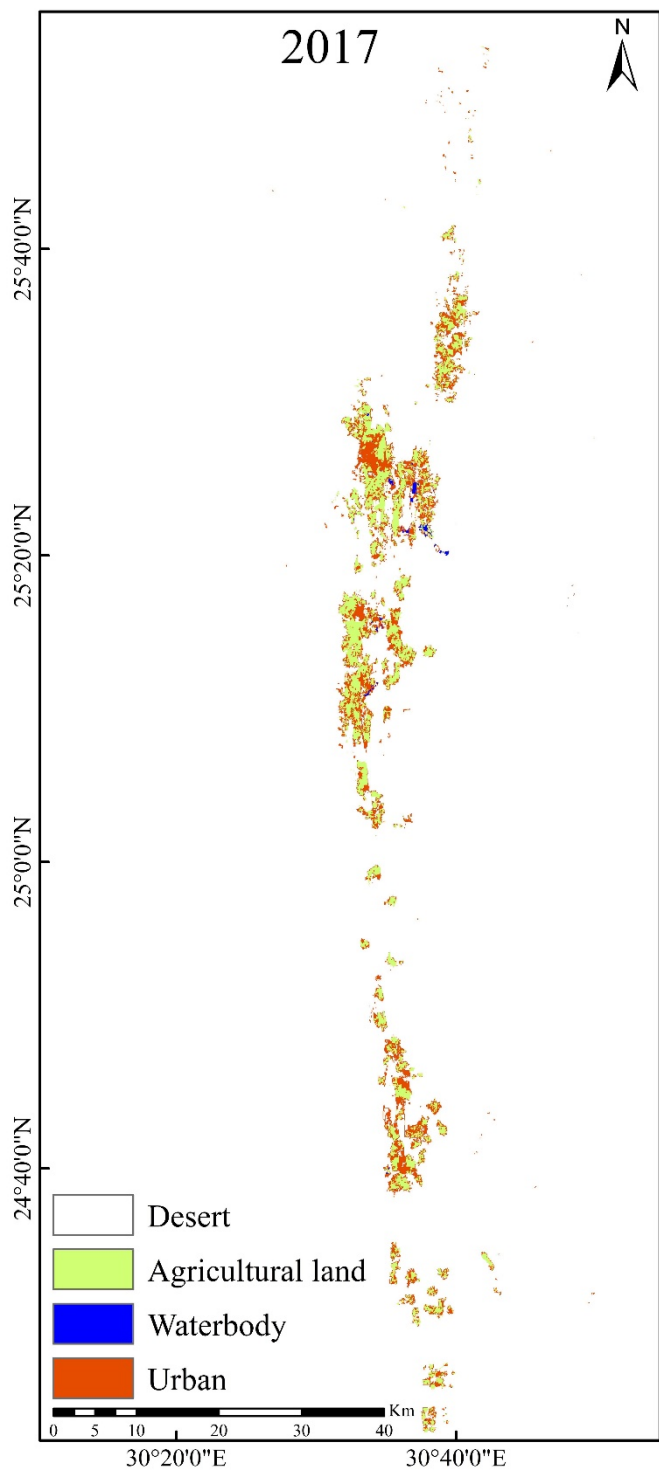

(k)

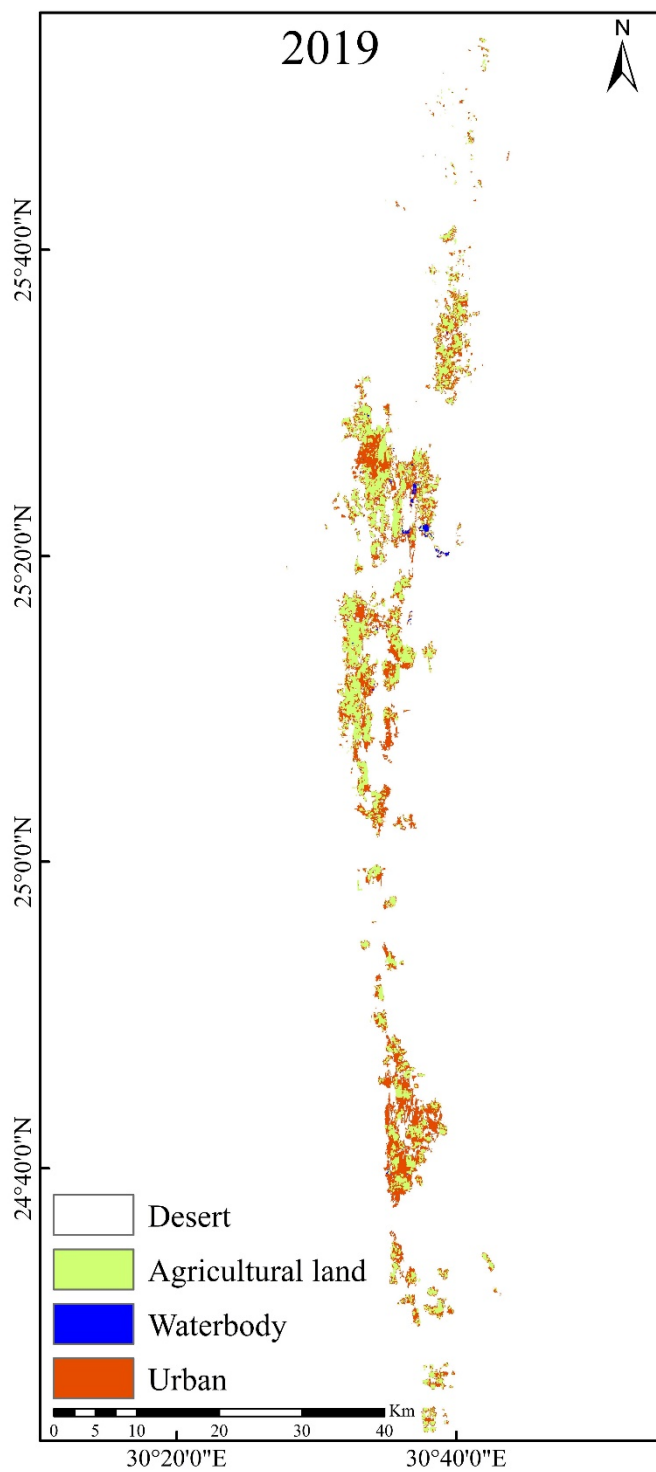

(l)

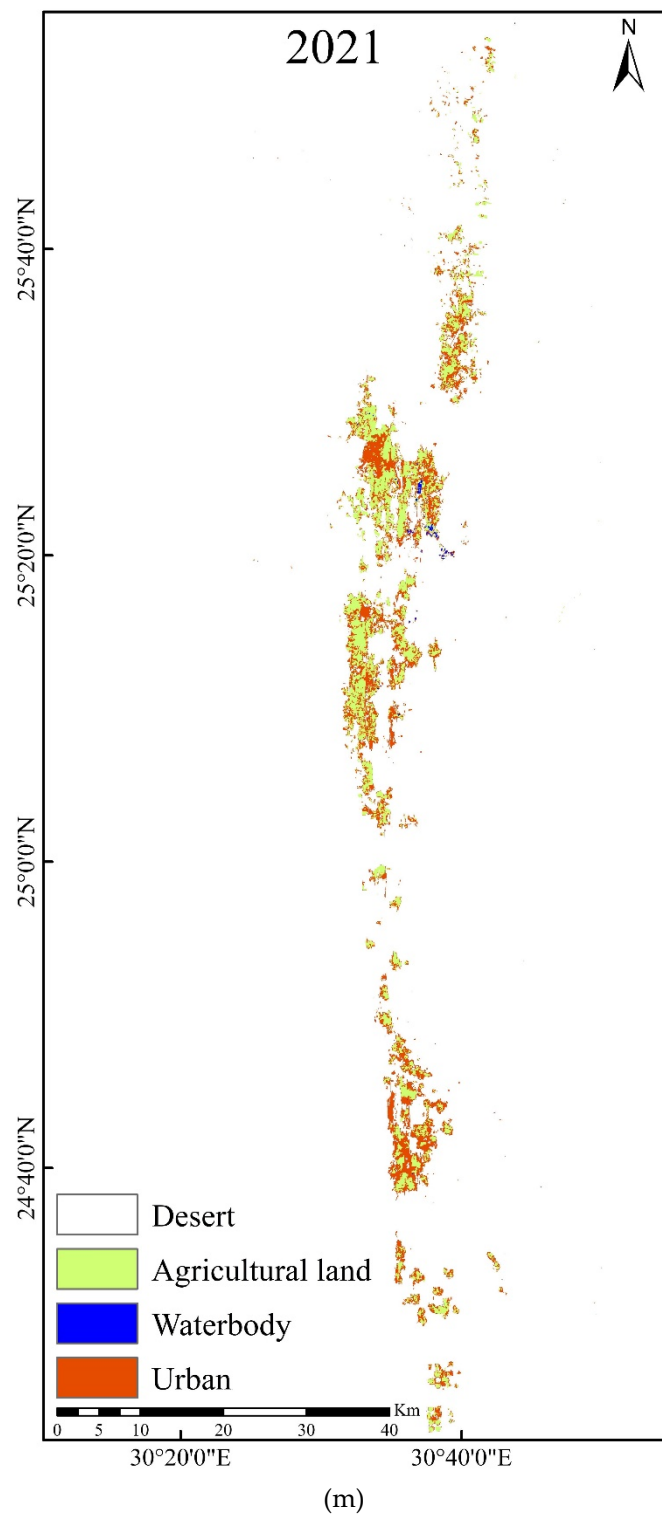



**Figure S2.** Land use and land cover classification maps of Kharga Oasis from (a) 1987 to (m) 2021
